# Supplementary material
Source: Springer Nature journal article supplement (https://www.springermedizin.de/resource/supplementary/12889_2012_5813_MOESM2_ESM.pdf/9496274)

Percent of monthly contacts and clinic visits

—◆— percent contacted monthly    —▲— percent visited clinic monthly

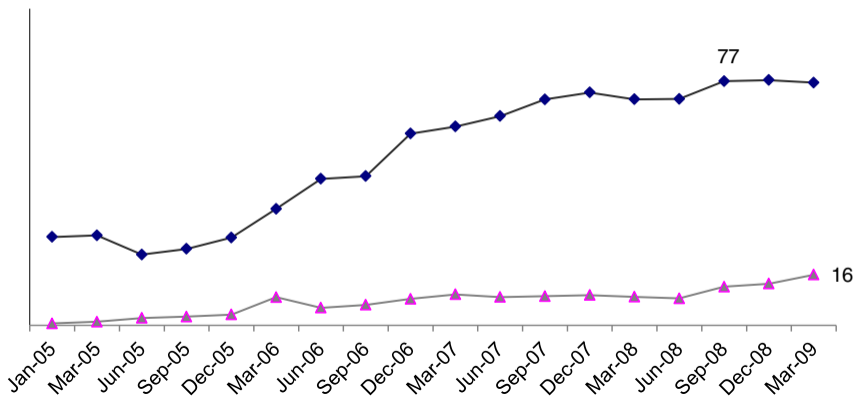

Supplement: MOESM2 [file 9496274]
